# Supplementary figures and images for: Prevalence of Suicidal Ideation and Suicide Attempts Among Refugees: A Meta-analysis
Source: Research Square preprint supplement (doi:10.21203/rs.3.rs-732316/v1), 2021-09-16

**Appendix**

**
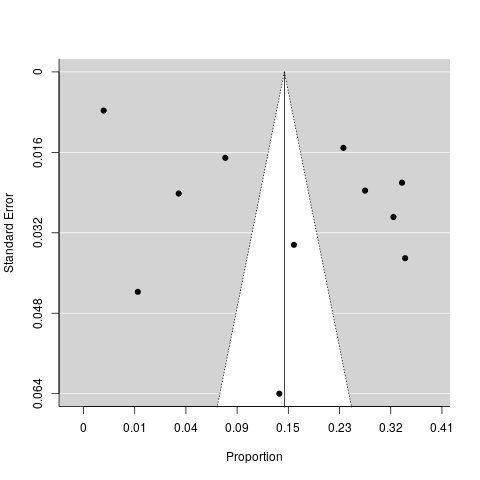
**

**Figure A1) Funnel plot - publication bias**

Supplement: Supplementary file 1 [file fbbd7a221cb8dfc58cd55363.docx]
